# Supplementary material for: microRNA-142–mediated repression of phosphodiesterase 3B critically regulates peripheral immune tolerance
Source: PubMed Central journal article supplement (PMC6391082; doi:10.1172/jci124725), 2019-02-11
Supplement: jci-129-124725-s270.pdf [file jci-129-124725-s270.pdf]

**A**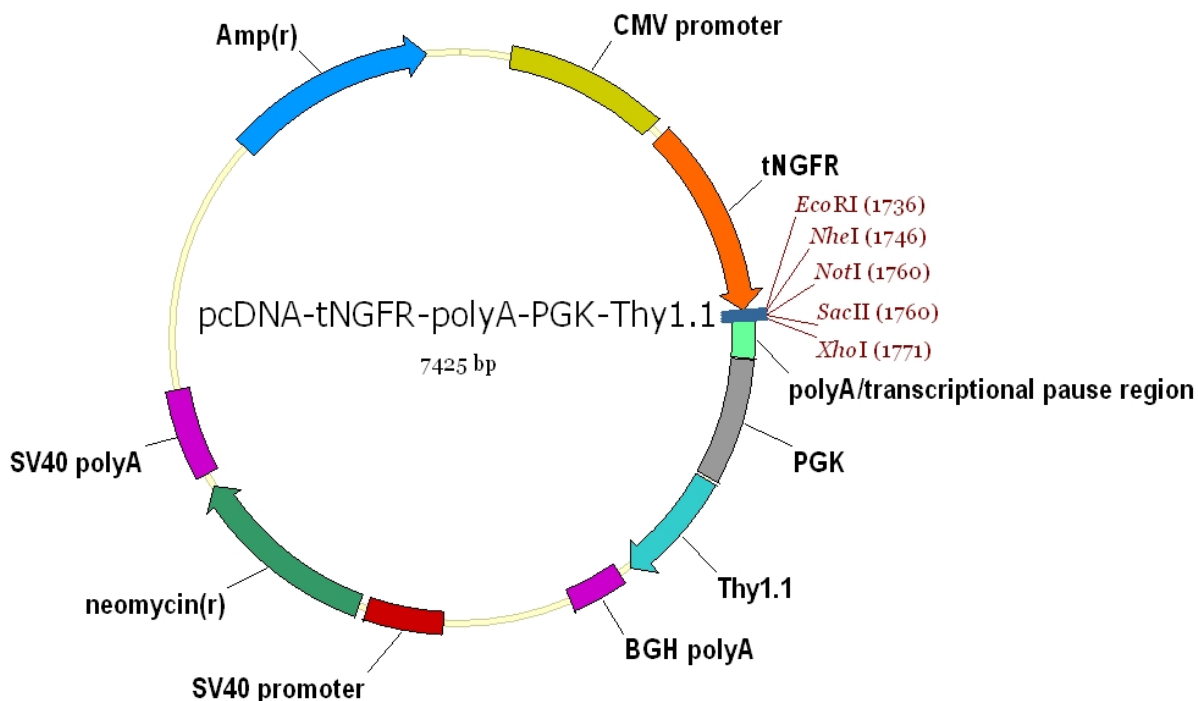**B**

Original 3' UTR seed sequence: 5' -UUUAAUGAAUCACUACACUUUAAU-3'

miR-142-5p: 3' -UCAUCAC-GAAAGA--UGAAAUAC-5'

Mutated 3' UTR seed sequence: 5' -UUUAAUGAAUCACUACUAGGGAAU-3'

**Supplemental figure 1. The miR-target reporter gene flow-cytometry-based assay.** (A) The reporter vector used to identify miRNA-target interactions. The vector expresses two cell surface molecules (tNGFR and Thy1.1) each under the control of a separate promoter. A poly(A) signal and transcriptional pause element serves to protect the Thy1.1-expression cassette from transcripts arising from the CMV promoter. 3'UTRs of transcripts tested are cloned into the multiple cloning site located downstream of the tNGFR gene. After co-transfection of the reporter vector with a miRNA-expression vector or a control vector, the expression levels of both cell surface markers are determined by flow-cytometry. Thy1.1 expression is used to normalise for differences in transfection efficiency between replicate wells (B) Mutation of the miR-142-5p seed sequence in the reporter construct: an overview of the interaction between miR-142-5p (middle) with the wild-type Pde3b 3'UTR (position 1550 to 1573 of Pde3b 3' UTR shown, top) and the target sequence containing five base substitutions in the seed sequence (bottom). Vertical lines indicate base pairing and mutated bases disrupting interaction between the miR-142-5p and the target sequence are highlighted in red.

**A**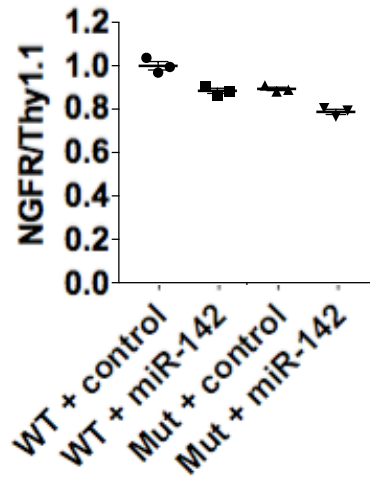**B**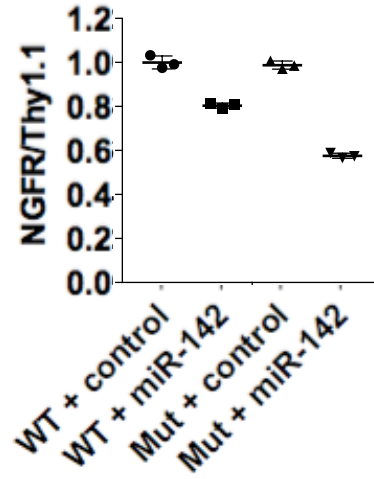

**Supplemental figure 2. Predicted miR-142-3p target sites in *Epas1* and *Igf2bp3* 3'UTRs are not functional in a miRNA reporter assay.** HEK293T cells were co-transfected with a dual reporter and miR-142 or control expression vectors. Reporter constructs contained regions of mouse 3'UTRs of *Igf2bp3* or *Epas1* encompassing predicted miR-142-3p sites (WT) or with mutated miR-142 seed sequence (Mut). NGFR reporter expression was measured 48 hours after transfection and normalized to Thy1.1 expression. Values are relative to normalized reporter expression in control transfected cells. Data represent one experiment and values are means  $\pm$  SEM from three independent transfections. **(A)** *Igf2bp3* 3'UTR **(B)** *Epas1* 3'UTR

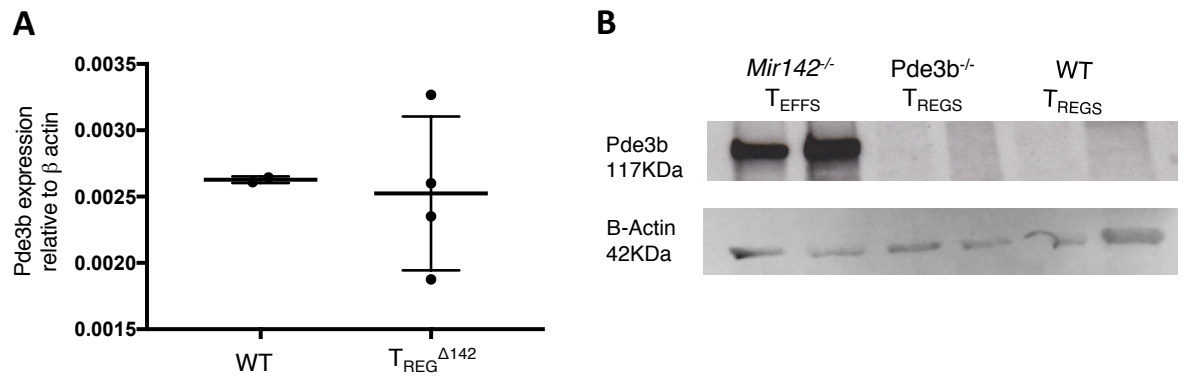

**Supplemental figure 3. (A)** *Pde3b* expression in  $T_{REG}^{\Delta142}$  and WT non- $T_{REG}$  T cell by RTqPCR. (n = 4; non significant, two-tailed Student's t test) **(B)** *Pde3b* expression in *Mir142*<sup>-/-</sup> T<sub>EFFS</sub> (positive control), *Pde3b*<sup>-/-</sup> T<sub>REGS</sub> (negative control) and WT T<sub>REGS</sub> by Western blot.

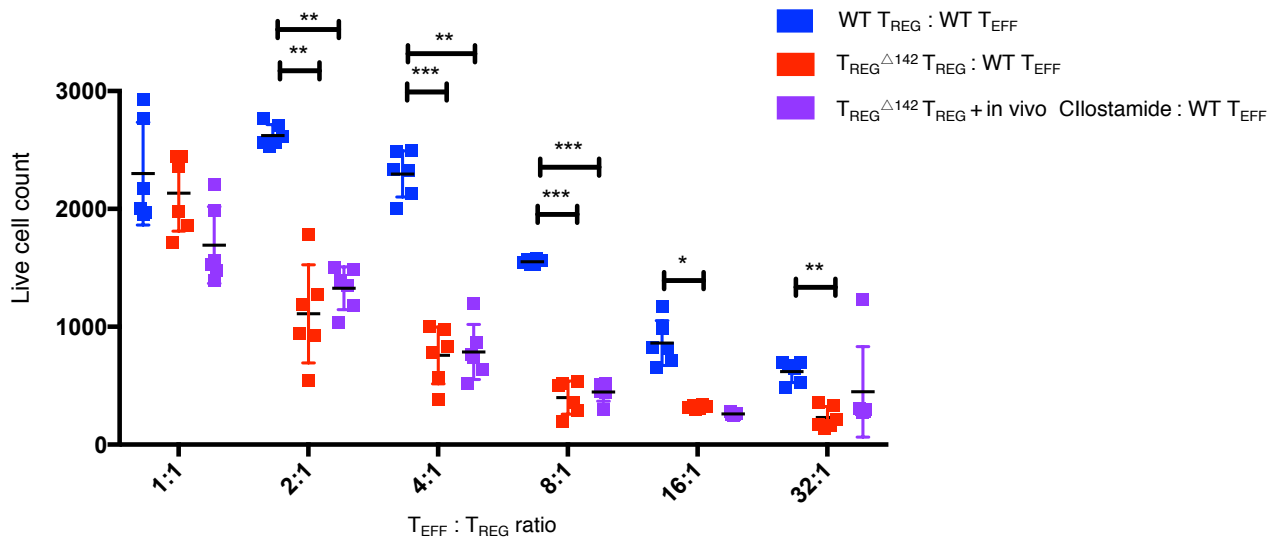

**Supplemental figure 4.  $T_{REG}$  viability.** Live cell count after 72 hours in vitro co-culture  $T_{REG}$  suppression assay ( $n \geq 6$ ; \* $p < 0.05$ , \*\* $p < 0.01$ , \*\*\* $p < 0.001$ , Student's t-test).

| Antibody                  | Source                   | Catalogue Number / Clone |
|---------------------------|--------------------------|--------------------------|
| Live Dead Yellow          | Thermo Fisher Scientific | L34959                   |
| CD45 Alexa Fluor 700      | Thermo Fisher Scientific | 56-0451-82 / 30-F11      |
| CD3e PE                   | Thermo Fisher Scientific | 12-0031-83 / 145-2C11    |
| CD3e Pacific Blue         | Thermo Fisher Scientific | HM3428 / 500A2           |
| CD4 PE                    | Thermo Fisher Scientific | 12-0041-82 / GK1.5       |
| CD4 PerCPCy5.5            | Thermo Fisher Scientific | 45-0042-82 / RM4-5       |
| CD8 APC Cy7               | Thermo Fisher Scientific | A15386 / 53-6.7          |
| CD8 PE                    | Thermo Fisher Scientific | MA1-10304 / 53-6.7       |
| CD25 AlexaFluor 488       | Thermo Fisher Scientific | 53-0251-82 / PC61.5      |
| CD25 APC-Cy7              | Thermo Fisher Scientific | 17-0251-82 / PC61.5      |
| CD25 PE                   | Thermo Fisher Scientific | 12-0251-82 / PC61.5      |
| CD44 PECy7                | Thermo Fisher Scientific | 25-0441-82 / IM7         |
| CD44 Pacific Blue         | Thermo Fisher Scientific | 48-0441-82 / IM7         |
| CD62L Pacific Blue        | Thermo Fisher Scientific | RM4328 / MEL-14          |
| CD62L PE                  | Thermo Fisher Scientific | 12-0621-82 / MEL-14      |
| ICOS PECy5                | Thermo Fisher Scientific | 15-9942-81 / 7E.17G9     |
| GITR PECy7                | Thermo Fisher Scientific | 25-5872-82 / DTA-1       |
| CXCR3 PE                  | Thermo Fisher Scientific | 12-1831-82 / CXCR3-173   |
| CD127 APC                 | Thermo Fisher Scientific | 17-1271-82 / A7R34       |
| FoxP3 Alexa Fluor 700     | Thermo Fisher Scientific | 56-5773-82 / FJK-16s     |
| FoxP3 PECy7               | Thermo Fisher Scientific | 25-5773-82 / FJK-16s     |
| FoxP3 APC                 | Thermo Fisher Scientific | 17-5773-82 / FJK-16s     |
| T-bet PE                  | Thermo Fisher Scientific | 12-5825-82 / 4B10        |
| CTLA-4 APC                | Thermo Fisher Scientific | 17-1522-82 / UC10-4B9    |
| IFN $\gamma$ PE           | Thermo Fisher Scientific | 12-7311-82 / XMG1.2      |
| IFN $\gamma$ Pacific Blue | Thermo Fisher Scientific | 48-7311-82 / XMG1.2      |
| IL-17A AlexaFluor 488     | Thermo Fisher Scientific | 53--7177-82 / eBio17B7   |
| IL-17A PECy7              | Thermo Fisher Scientific | 25-7177-82 / eBio17B7    |
| IL-2 APC                  | Thermo Fisher Scientific | 17-7021-82 / JES6-5H4    |
| IL-4 FITC                 | Thermo Fisher Scientific | 11-7042-82 / BVD6-24G2   |
| IL-4 PE                   | Thermo Fisher Scientific | 12-7042-82 / BVD6-24G2   |
| IL-5 PE                   | Thermo Fisher Scientific | 12-7052-82 / TRFK5       |
| IL-10 Alexa Fluor 700     | Thermo Fisher Scientific | 56-7101-82 / JES5-16E3   |
| CD3 Biotin                | Thermo Fisher Scientific | 13-0037-82 / OKT3        |
| CD4 Biotin                | Thermo Fisher Scientific | 36-0041-85 / GK1.5       |
| CD8 Biotin                | Thermo Fisher Scientific | 13-0081-85 / 53-6.7      |
| CD19 Biotin               | Thermo Fisher Scientific | 13-0193-82 / 1D3         |
| TCR $\gamma\delta$ Biotin | Thermo Fisher Scientific | 13-5711-82 / GL-3        |
| CD11b Biotin              | Thermo Fisher Scientific | 13-0112-82 / M1/70       |
| CD11c Biotin              | Thermo Fisher Scientific | 13-0114-82 / N418        |
| Ly6G Biotin               | Thermo Fisher Scientific | 13-5931-82 / RB6-8C5     |
| TER-119 Biotin            | Thermo Fisher Scientific | MA5-17819 / TER119       |
| NK1.1 Biotin              | Thermo Fisher Scientific | 13-5941-82 / PK136       |
| Streptavidin              | Thermo Fisher Scientific | 45-4317-82               |

**Supplemental table 1.** Antibodies used in flow cytometry and intracellular cytokine staining

| <b>Primer name</b>                 | <b>Primer sequence</b>                   |
|------------------------------------|------------------------------------------|
| Pde3b 3'UTR F                      | CATGCGGCCGCGATGCTGGAATTTCTTACCTACCTAA    |
| Pde3b 3'UTR R                      | GATCTCGAGTATGGTGGGACCAGTTTACAAATG        |
| miR-142-5p seed mutation sense     | AATGAATCACTACTAG <b>GGG</b> ATTTATTAACAT |
| miR-142-5p seed mutation antisense | ATGTTTAATAA <b>ATCCCT</b> AGTAGTGATTCATT |
| poly(A)/transcriptional pause F    | TGACTCGAGAATAAAATATCTTTATTTTCATTACATCTG  |
| poly(A)/transcriptional pause R    | CGACGGCCGAGAGAAATGTTCTGGCACCTGC          |
| tNGFR F                            | CGTAGATCTGCCACCATGGACGGGCCGCGCCTGCT      |
| tNGFR R                            | CTGGAATTCCTAGAGGATCCCCCTGTTCCACCTCT      |
| MCS for reporter vector sense      | AATTCTCACGCTAGCTCTAGCCGCGGCCGCATCAC      |
| MCS for reporter vector antisense  | TCGAGTGATGCGGCCGCGGCTAGAGCTAGCGTGAG      |
| PGK-Thy1.1                         | TCAGCGGCCGCAATTCTACCGGGTAGGGGAGGC        |
| PGK-Thy1.1                         | GCTGTCTGACTCACAGAGAAATGAAGTCCAGGGCTTG    |

**Supplemental table 2.** Primer sequences used in cloning of the miR-target reporter vector. Restriction sites are underlined, the Kozac sequence is indicated in italics and bases mutated in the miR-142-5p seed sequence are highlighted in bold.
